# Supplementary material for: Heme Oxygenase-1 Inhibition Modulates Autophagy and Augments Arsenic Trioxide Cytotoxicity in Pancreatic Cancer Cells
Source: MDPI journal article supplement (doi:10.3390/biomedicines11092580), 2023-09-20
Supplement: s1 [file s1]

Figure S1

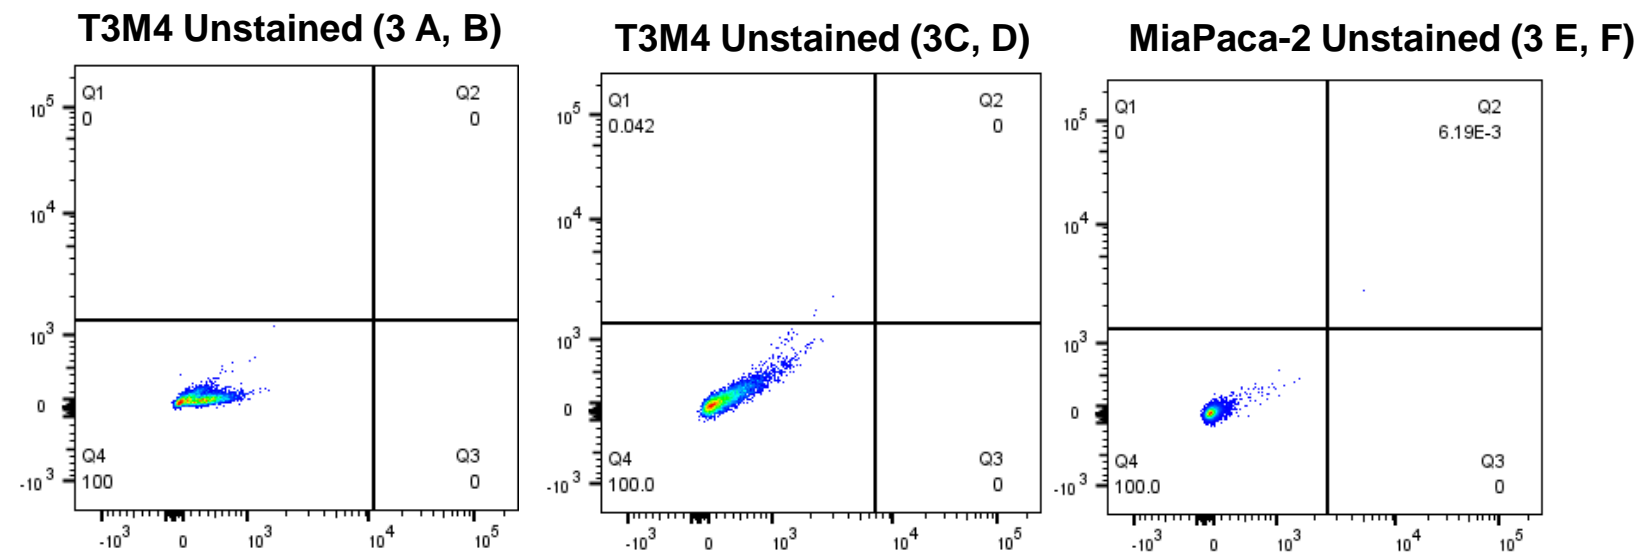

Figure S2

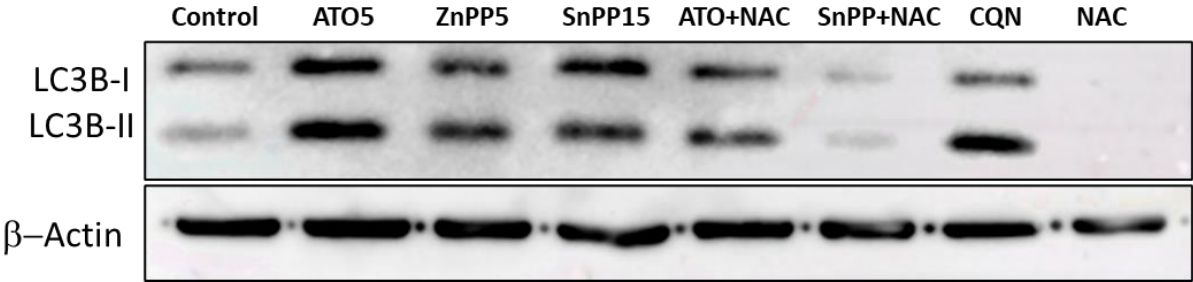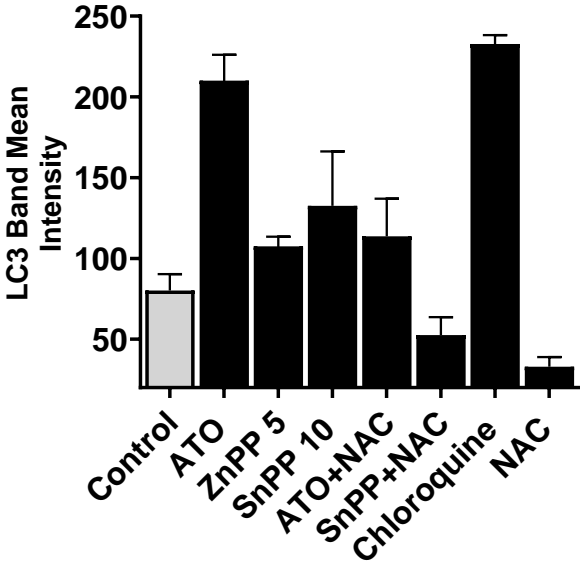

Figure S1. Unstained controls flow cytometry experiments in figure 3. Cells are not showing any auto-Fluorescence.

Figure S2 Inhibiting HO-1 suppress autophagy in ROS mediated mechanism. PDAC cells were treated with ATO (5  $\mu$ M), SnPP (15  $\mu$ M), NAC (1 mM), Chloroquine (15  $\mu$ M) or combinations for 24 h. Control cells were treated with DMSO as a control. LC3 was measured by western blot. NAC reduced LC3 expression indicating that autophagy markers were increased by ROS mechanism. (Right) densitometric analysis of immunoblotting of autophagy protein LC3.
